# Supplementary material for: Poly(methacrylate citric acid) as a Dual Functional Carrier for Tumor Therapy
Source: MDPI journal article supplement (doi:10.3390/pharmaceutics14091765), 2022-08-24
Supplement: s1 [file s1]

## Supplementary Materials

### Poly(methacrylate citric acid) as a dual functional carrier for tumor therapy

Bo Yu<sup>a</sup>, Yiping Shen<sup>a</sup>, Xuejie Zhang<sup>a</sup>, Lijuan Ding<sup>a</sup>, Zheng Meng<sup>a</sup>, Xiaotong Wang<sup>a</sup>, Meihua Han<sup>a</sup>, Yifei Guo<sup>a,b,c,d</sup>, \* Xiangtao Wang<sup>a\*</sup>

<sup>a</sup> Institute of Medicinal Plant Development, Chinese Academy of Medical Sciences & Peking Union Medical College, No. 151, Malianwa North Road, Haidian District, Beijing 100193, China

<sup>b</sup> Key Laboratory of Bioactive Substances and Resources Utilization of Chinese Herbal Medicine, Ministry of Education, Chinese Academy of Medical Sciences, Peking Union Medical College, Beijing 100094, China

<sup>c</sup> Key Laboratory of New Drug Discovery Based on Classic Chinese Medicine Prescription, Beijing 100700, China

<sup>d</sup> Beijing Key Laboratory of Innovative Drug Discovery of Traditional Chinese Medicine (Natural Medicine) and Translational Medicine, No. 151, Malianwa North Road, Haidian District, Beijing 100193, China

Table S1. Zeta potential of the free drug without nanocarrier

| Sample       | RES            | NIF            | IBU            | DOX            | HCPT            | CSL             | HK              | POD             |
|--------------|----------------|----------------|----------------|----------------|-----------------|-----------------|-----------------|-----------------|
| $\zeta$ (mV) | $10.5 \pm 1.1$ | $11.1 \pm 0.7$ | $15.5 \pm 0.9$ | $39.2 \pm 0.9$ | $-9.62 \pm 0.5$ | $-13.5 \pm 1.3$ | $-38.7 \pm 1.1$ | $-8.43 \pm 0.4$ |

a)

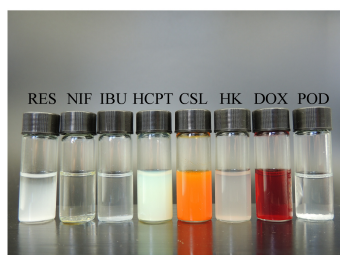

b)

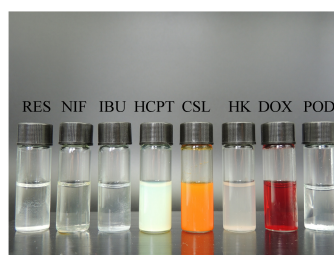

Figure S1. The images of drug-loaded nanoparticles: after preparation (a), storage for 24 h (b).

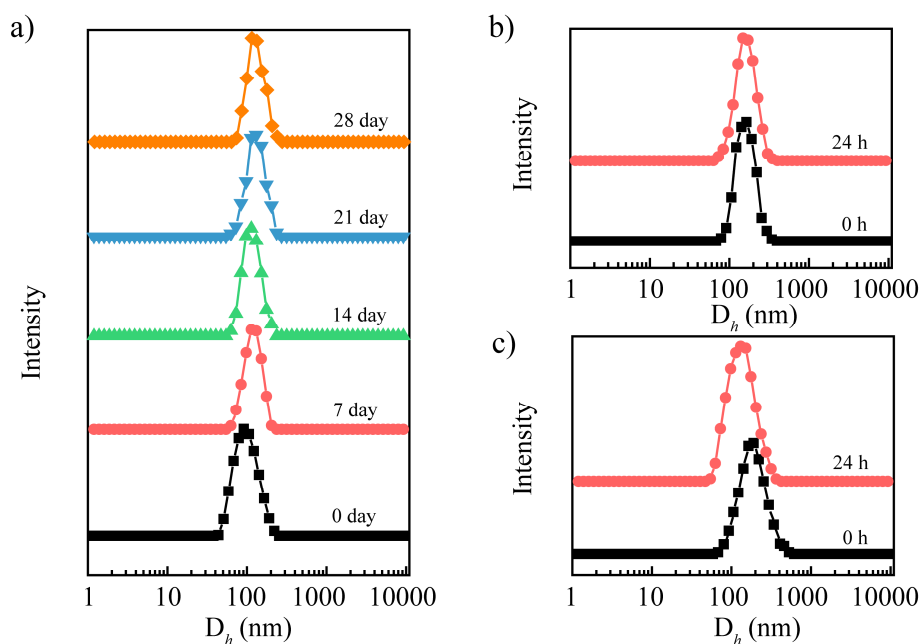

Figure S2. Particle size distribution curves of PCA/DOX NPs: storage stability at different times (a), glucose stability at different times (b), and plasma stability at different times (c).

Table S2. Drug release kinetic model for PCA/DOX NPs

| Sample          | pH | Zero-order model      |                | First-order model             |                | Higuchi model              |                | Ritger-Peppas model    |                |
|-----------------|----|-----------------------|----------------|-------------------------------|----------------|----------------------------|----------------|------------------------|----------------|
|                 |    | Equation              | R <sup>2</sup> | Equation                      | R <sup>2</sup> | Equation                   | R <sup>2</sup> | Equation               | R <sup>2</sup> |
| PCA/D<br>OX NPs | 5. | $Q_t = 0.46t + 11.09$ | 0.90           | $Q_t = 63.46(1 - e^{-0.03t})$ | 0.95           | $Q_t = 5.90t^{1/2} + 0.54$ | 0.98           | $Q_t = 5.56(t^{0.52})$ | 0.98           |
| PCA/D<br>OX NPs | 7. | $Q_t = 0.40t + 5.73$  | 0.97           | $Q_t = 70.72(1 - e^{-0.01t})$ | 0.96           | $Q_t = 4.86t^{1/2} - 2.37$ | 0.98           | $Q_t = 3.36(t^{0.57})$ | 0.98           |

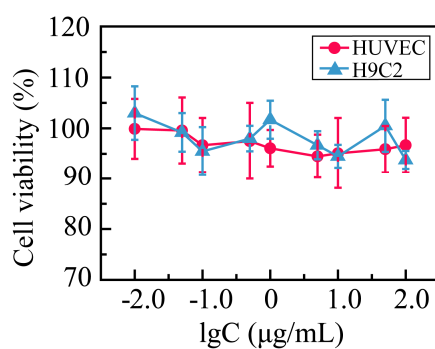

Figure S3. Cell viability of PCA against normal HUVEC and H9C2 cell lines for incubation 48 h at 37 °C, n = 5.

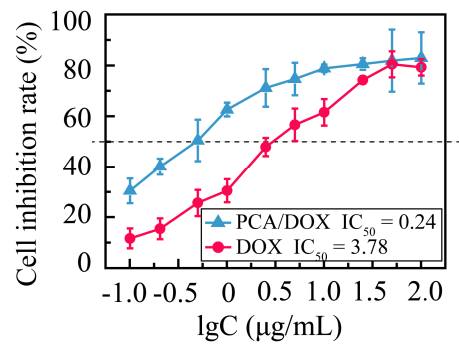

Figure S4. Cell viability of PCA/DOX NPs against 4T1 cell line for incubation 72 h at 37 °C, n = 5.
